# Supplementary material for: Imeglimin Exhibits Novel Anti-Inflammatory Effects on High-Glucose-Stimulated Mouse Microglia through ULK1-Mediated Suppression of the TXNIP–NLRP3 Axis
Source: MDPI journal article supplement (doi:10.3390/cells13030284), 2024-02-05
Supplement: s1 [file s1]

# *Cells*

Supplementary Materials for

**Imeglimin Exhibits Novel Anti-Inflammatory Effects on High Glucose-Stimulated Mouse Microglia through ULK1-Mediated Suppression of the TXNIP–NLRP3 Axis**

Hisashi Kato, Kaori Iwashita, Masayo Iwasa, Sayaka Kato, Hajime Yamakage, Takayoshi Suganami, Masashi Tanaka and Noriko Satoh-Asahara

This file includes Table S1, Table S2, and Figure S1.

**Supplementary Table S1.** List of primer sequences.

| <i>Genes</i>                  |         | Primers (5'-3')         | Reference |
|-------------------------------|---------|-------------------------|-----------|
| <i>Il-1<math>\beta</math></i> | Forward | CTGAACTCAACTGTGAAATGCCA | [1]       |
|                               | Reverse | AAAGGTTTGGGAAGCAGCCCT   |           |
| <i>Tnfa</i>                   | Forward | ACCCTCACACTCAGATCATCTTC | [2]       |
|                               | Reverse | TGGTGGTTTGCTACGACGT     |           |
| <i>Hmgb1</i>                  | Forward | CGCGGAGGAAAATCAACTAA    | [3]       |
|                               | Reverse | TCATAACGAGCCTTGTCAGC    |           |
| <i>Ulk1</i>                   | Forward | CACTGCGTGGCTCACCTAAG    | [4]       |
|                               | Reverse | AGCCAACAGGGTCAGCAAAT    |           |
| <i>18s</i>                    | Forward | CGATGCTCTTAGCTGAGTGT    | [1]       |
|                               | Reverse | GGTCCAAGAATTTACCTCT     |           |

## References

1. Iwasa, M.; Kato, H.; Iwashita, K.; Yamakage, H.; Kato, S.; Saito, S.; Ihara, M.; Nishimura, H.; Kawamoto, A.; Suganami, T., et al. Taxifolin Suppresses Inflammatory Responses of High-Glucose-Stimulated Mouse Microglia by Attenuating the TXNIP-NLRP3 Axis. *Nutrients* **2023**, *15*, doi:10.3390/nu15122738.
2. Yang, W.; Zhou, K.; Zhou, Y.; An, Y.; Hu, T.; Lu, J.; Huang, S.; Pei, G. Naringin Dihydrochalcone Ameliorates Cognitive Deficits and Neuropathology in APP/PS1 Transgenic Mice. *Front. Aging Neurosci.* **2018**, *10*, 169, doi:10.3389/fnagi.2018.00169.
3. Lowe, P.P.; Gyongyosi, B.; Satishchandran, A.; Iracheta-Vellve, A.; Cho, Y.; Ambade, A.; Szabo, G. Reduced gut microbiome protects from alcohol-induced neuroinflammation and alters intestinal and brain inflammasome expression. *J. Neuroinflammation* **2018**, *15*, 298, doi:10.1186/s12974-018-1328-9.
4. Goldberg, A.A.; Nkengfac, B.; Sanchez, A.M.J.; Moroz, N.; Qureshi, S.T.; Koromilas, A.E.; Wang, S.; Burelle, Y.; Hussain, S.N.; Kristof, A.S. Regulation of ULK1 Expression and Autophagy by STAT1. *J. Biol. Chem.* **2017**, *292*, 1899-1909, doi:10.1074/jbc.M116.771584.

**Supplementary Table S2.** List of antibodies.

| Antibodies                           | Supplier                                              | Catalog no. |
|--------------------------------------|-------------------------------------------------------|-------------|
| anti- $\beta$ -actin                 | Cell Signaling Technology (CST), Danvers, MA, USA     | #4967       |
| anti-AMPK $\alpha$                   | CST                                                   | #5831       |
| anti-ASC                             | CST                                                   | #67824      |
| anti-ATG7                            | CST                                                   | #8558       |
| anti-Cleaved caspase-1<br>Asp296     | CST                                                   | #89332      |
| anti-Cleaved caspase-3<br>Asp175     | CST                                                   | #9661       |
| anti-Caspase-3                       | CST                                                   | #9662       |
| anti-GAPDH                           | CST                                                   | #2118       |
| anti-HMGB1                           | CST                                                   | #3935       |
| anti-NLRP3                           | CST                                                   | #15101      |
| anti-Parkin                          | CST                                                   | #2132       |
| anti-PARP                            | CST                                                   | #9532       |
| anti-phospho ULK1<br>Ser555          | CST                                                   | #5869       |
| anti-phospho AMPK $\alpha$<br>Thr172 | CST                                                   | #2535       |
| anti-TXNIP                           | CST                                                   | #14715      |
| anti-ULK1                            | CST                                                   | #8054       |
| anti-LC3                             | MEDICAL & BIOLOGICAL LABORATORIES (MBL), Tokyo, Japan | M152-3      |
| anti-p62                             | MBL                                                   | PM045       |
| anti-Caspase-1                       | Proteintech, Rosemont, IL, USA                        | 22915-1-AP  |
| anti-PINK1                           | Novus Biologicals, Centennial, CO, USA                | BC100-494   |
| anti-mouse IgG, HRP-linked antibody  | CST                                                   | #7076       |
| anti-rabbit IgG, HRP-linked antibody | CST                                                   | #7074       |

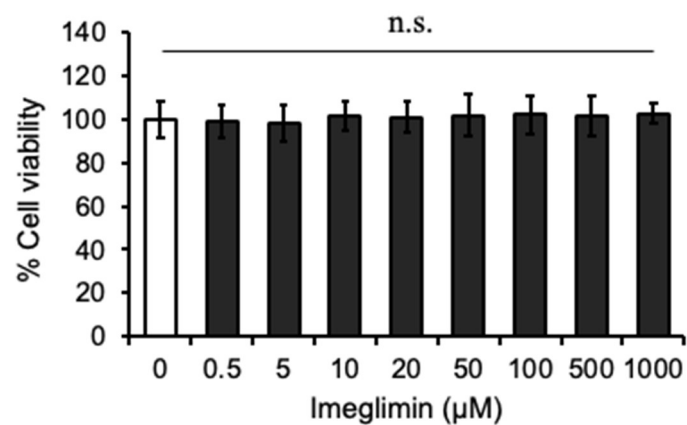

**Figure S1.** Cytotoxic effects of imeglimin on BV2 cells. Cells were incubated with imeglimin at the dose indicated or the vehicle control for 24 h. The cytotoxicity was determined using a colorimetric assay based on dehydrogenase activity. Data are presented as the mean  $\pm$  SEM from three independent experiments ( $n = 3$ ). n.s.: not significant, SEM: standard error of the mean.
